# Supplementary material for: Automated Production of [<sup>68</sup>Ga]Ga-desferrioxamine B on Two Different Synthesis Platforms
Source: Preprints.org preprint supplement (doi:10.20944/preprints202407.2268.v1), 2024-07-29
Supplement: Supplementary file 1 [file supplementary]

**Supplementary material**


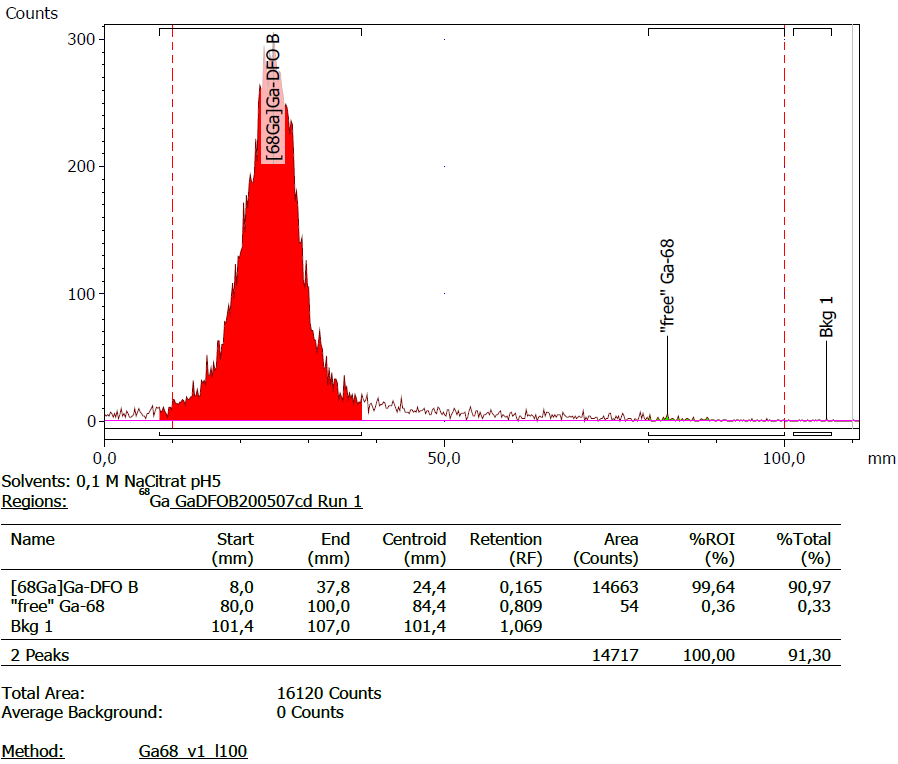


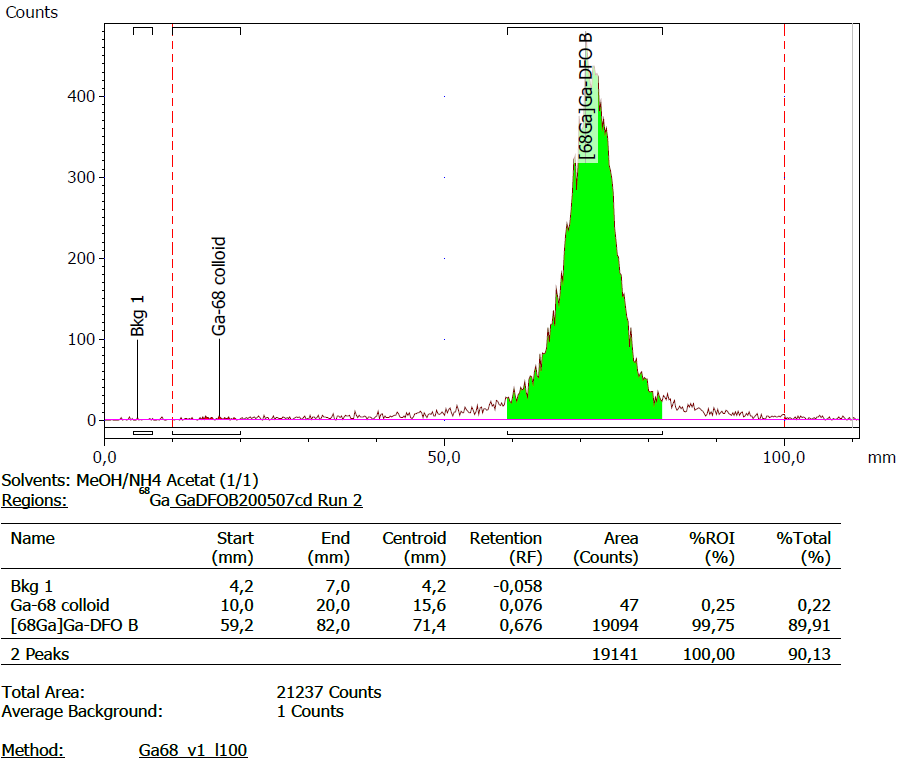


*Figure S1* Sample chromatograms from ITLC of [68Ga]Ga-desferrioxamine B with silica gel as stationary phase. Chromatograms with mobile phase A (**upper panel**: sodium citrate 0.1 M with pH 5) and mobile phase B (**lower panel**: ammonium acetate 1 M + methanol 1:1 v/v) are shown.


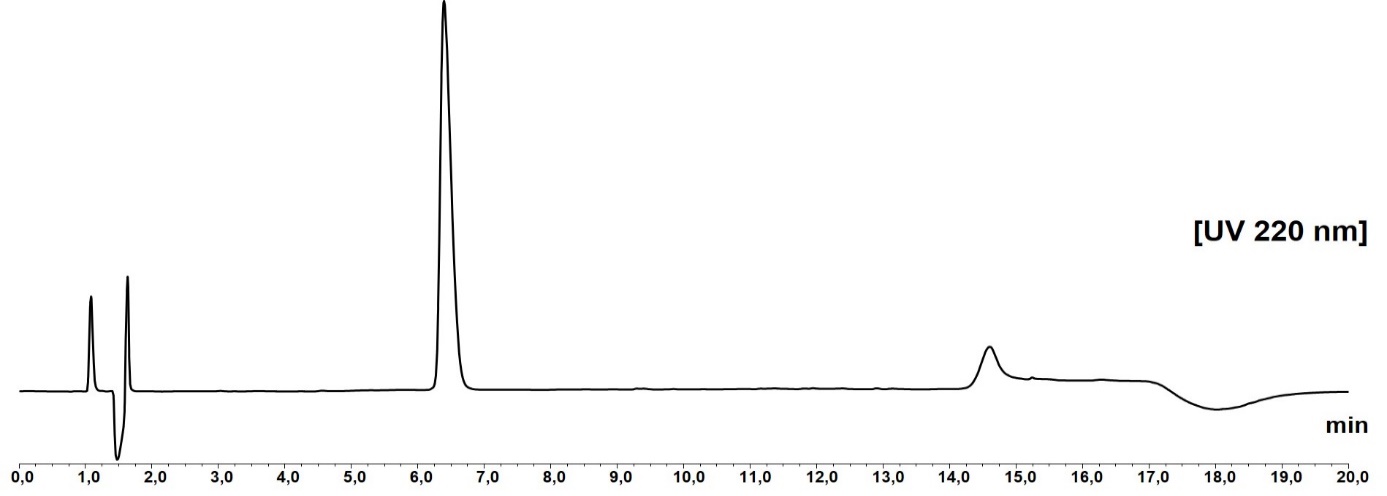


*Figure S2* Sample UV chromatogram at 220 nm from RP-HPLC of [natGa]Ga-desferrioxamine B. The main peak has a retention time of 6.4 min.

**
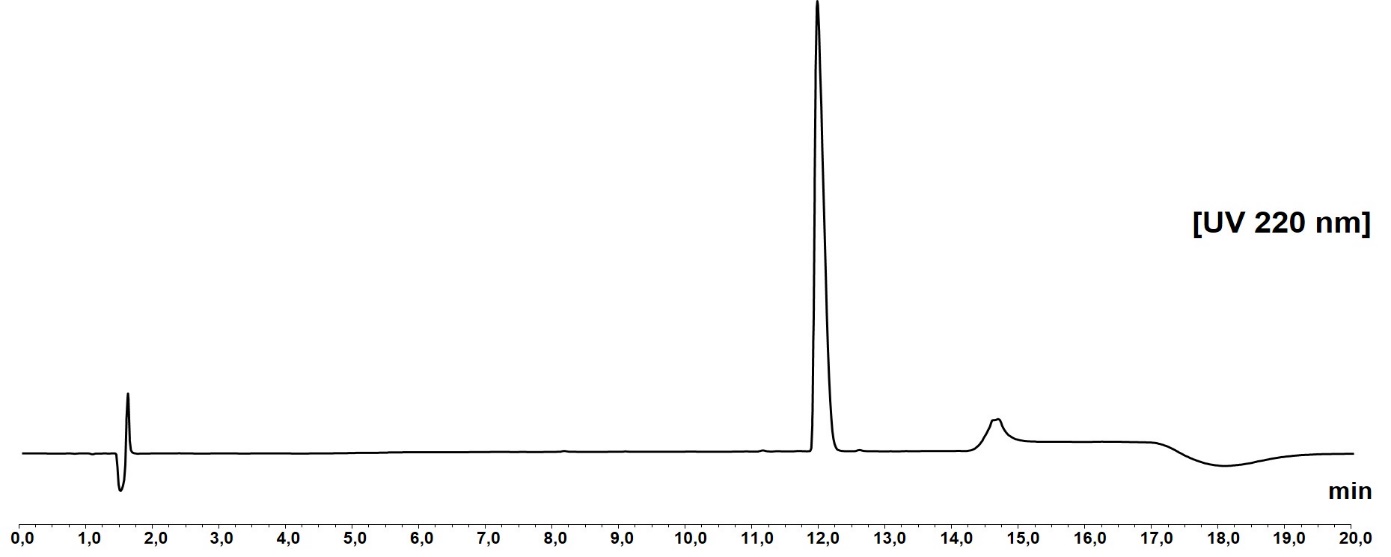
**

*Figure S3* Sample UV chromatogram at 220 nm from RP-HPLC of desferrioxamine B (Desferal®). The main peak has a retention time of 11.9 min.

**
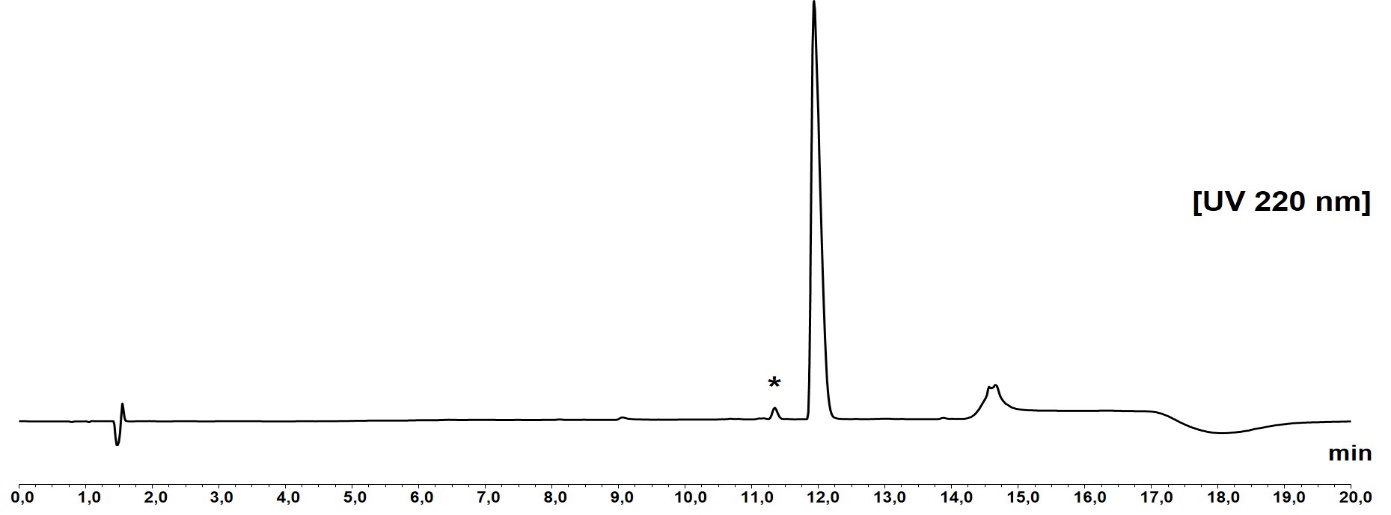
**

*Figure S4* Sample UV chromatogram at 220 nm from RP-HPLC of desferrioxamine B (CRS standard for system suitability). The main peak has a retention time of 11.9 min. An impurity specified as impurity G in the Ph. Eur. is visible at 11.3 min (marked with an asterisk * in the chromatogram).
